# Supplementary material
Source: MDPI journal article supplement (https://www.mdpi.com/2039-7283/11/3/65)
Supplement: s1 [file s1]

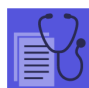**Table S1.** Overall prevalence of thyroid disorder in study population, stratified by age-subgroup.

|           |              | Thyroid Function |                        |                         |                            |                             | Total |
|-----------|--------------|------------------|------------------------|-------------------------|----------------------------|-----------------------------|-------|
|           |              | Euthyroidism     | Primary hypothyroidism | Primary Hyperthyroidism | Subclinical Hypothyroidism | Subclinical Hyperthyroidism |       |
| Age range | Below 20     | (2.7%) 271       | (0.1%) 5               | 0.02% (2)               | (2.4%) 240                 | (0.01%) 1                   | 519   |
|           | 20-30        | (6.5%) 654       | (0.4%) 44              | (0.3%) 25               | (5.2%) 521                 | (0.3%) 27                   | 1271  |
|           | 31-40        | (15.3%) 1530     | (1.1%) 108             | (0.6%) 55               | (12.2%) 1217               | (0.7%) 69                   | 2979  |
|           | 41-50        | (10.6%) 1064     | (1.4%) 141             | (0.5%) 53               | (7.9%) 794                 | (0.7%) 68                   | 2120  |
|           | More than 50 | (15%) 1500       | (2.3%) 232             | (1.1%) 114              | (11.5%) 1150               | (1.1%) 107                  | 3103  |
|           | Total        | (50.2%) 5019     | (5.3%) 530             | (2.5%) 249              | (39.3%) 3922               | (2.7%) 272                  | 9992  |
